# Supplementary material for: Physicochemical Characterization and Evaluation of Gastrointestinal In Vitro Behavior of Alginate-Based Microbeads with Encapsulated Grape Pomace Extracts
Source: MDPI journal article supplement (doi:10.3390/pharmaceutics15030980), 2023-03-18
Supplement: s1 [file s1]

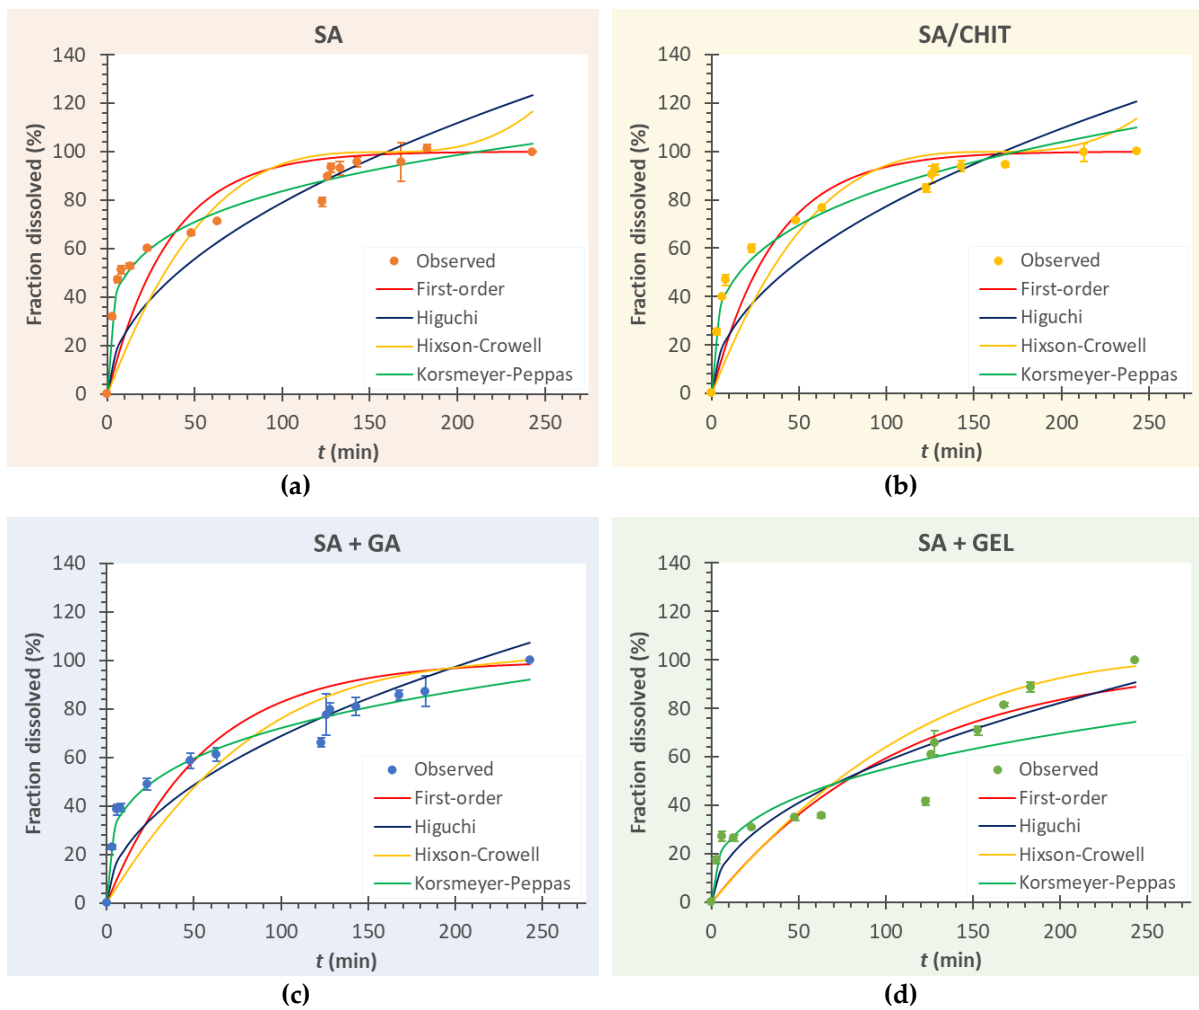

**Figure S1.** Kinetics of phenolic compound release from freeze-dried microbeads containing grape pomace extracts prepared with (a) sodium alginate (SA); (b) sodium alginate with chitosan (SA/CHIT); (c) sodium alginate with gum arabic (SA + GA); and (d) sodium alginate with gelatin (SA + GEL) (symbols - experimental data, lines - approximate curves according to different mathematical models).
